# Supplementary material for: Complete chloroplast genome of Campsis grandiflora (Thunb.) Schum and systematical comparative analysis within the family Bignoniaceae.
Source: Research Square preprint supplement (doi:10.21203/rs.3.rs-992863/v1), 2021-10-20
Supplement: Supplementary file 1 [file 2d200fada9a2ebaca4a9b405.docx]

Table S2. Frequency of classified repeat types (considering sequence complementary)

| **Type of repeat** | **Number of repeat** |
| --- | --- |
| A/T | 54 |
| C/G | 3 |
| AT/AT | 2 |
