# Supplementary material for: Complete chloroplast genome of Campsis grandiflora (Thunb.) Schum and systematical comparative analysis within the family Bignoniaceae.
Source: Research Square preprint supplement (doi:10.21203/rs.3.rs-992863/v1), 2021-10-20
Supplement: Supplementary file 2 [file 71f03ce2ca20dc6f25936226.docx]

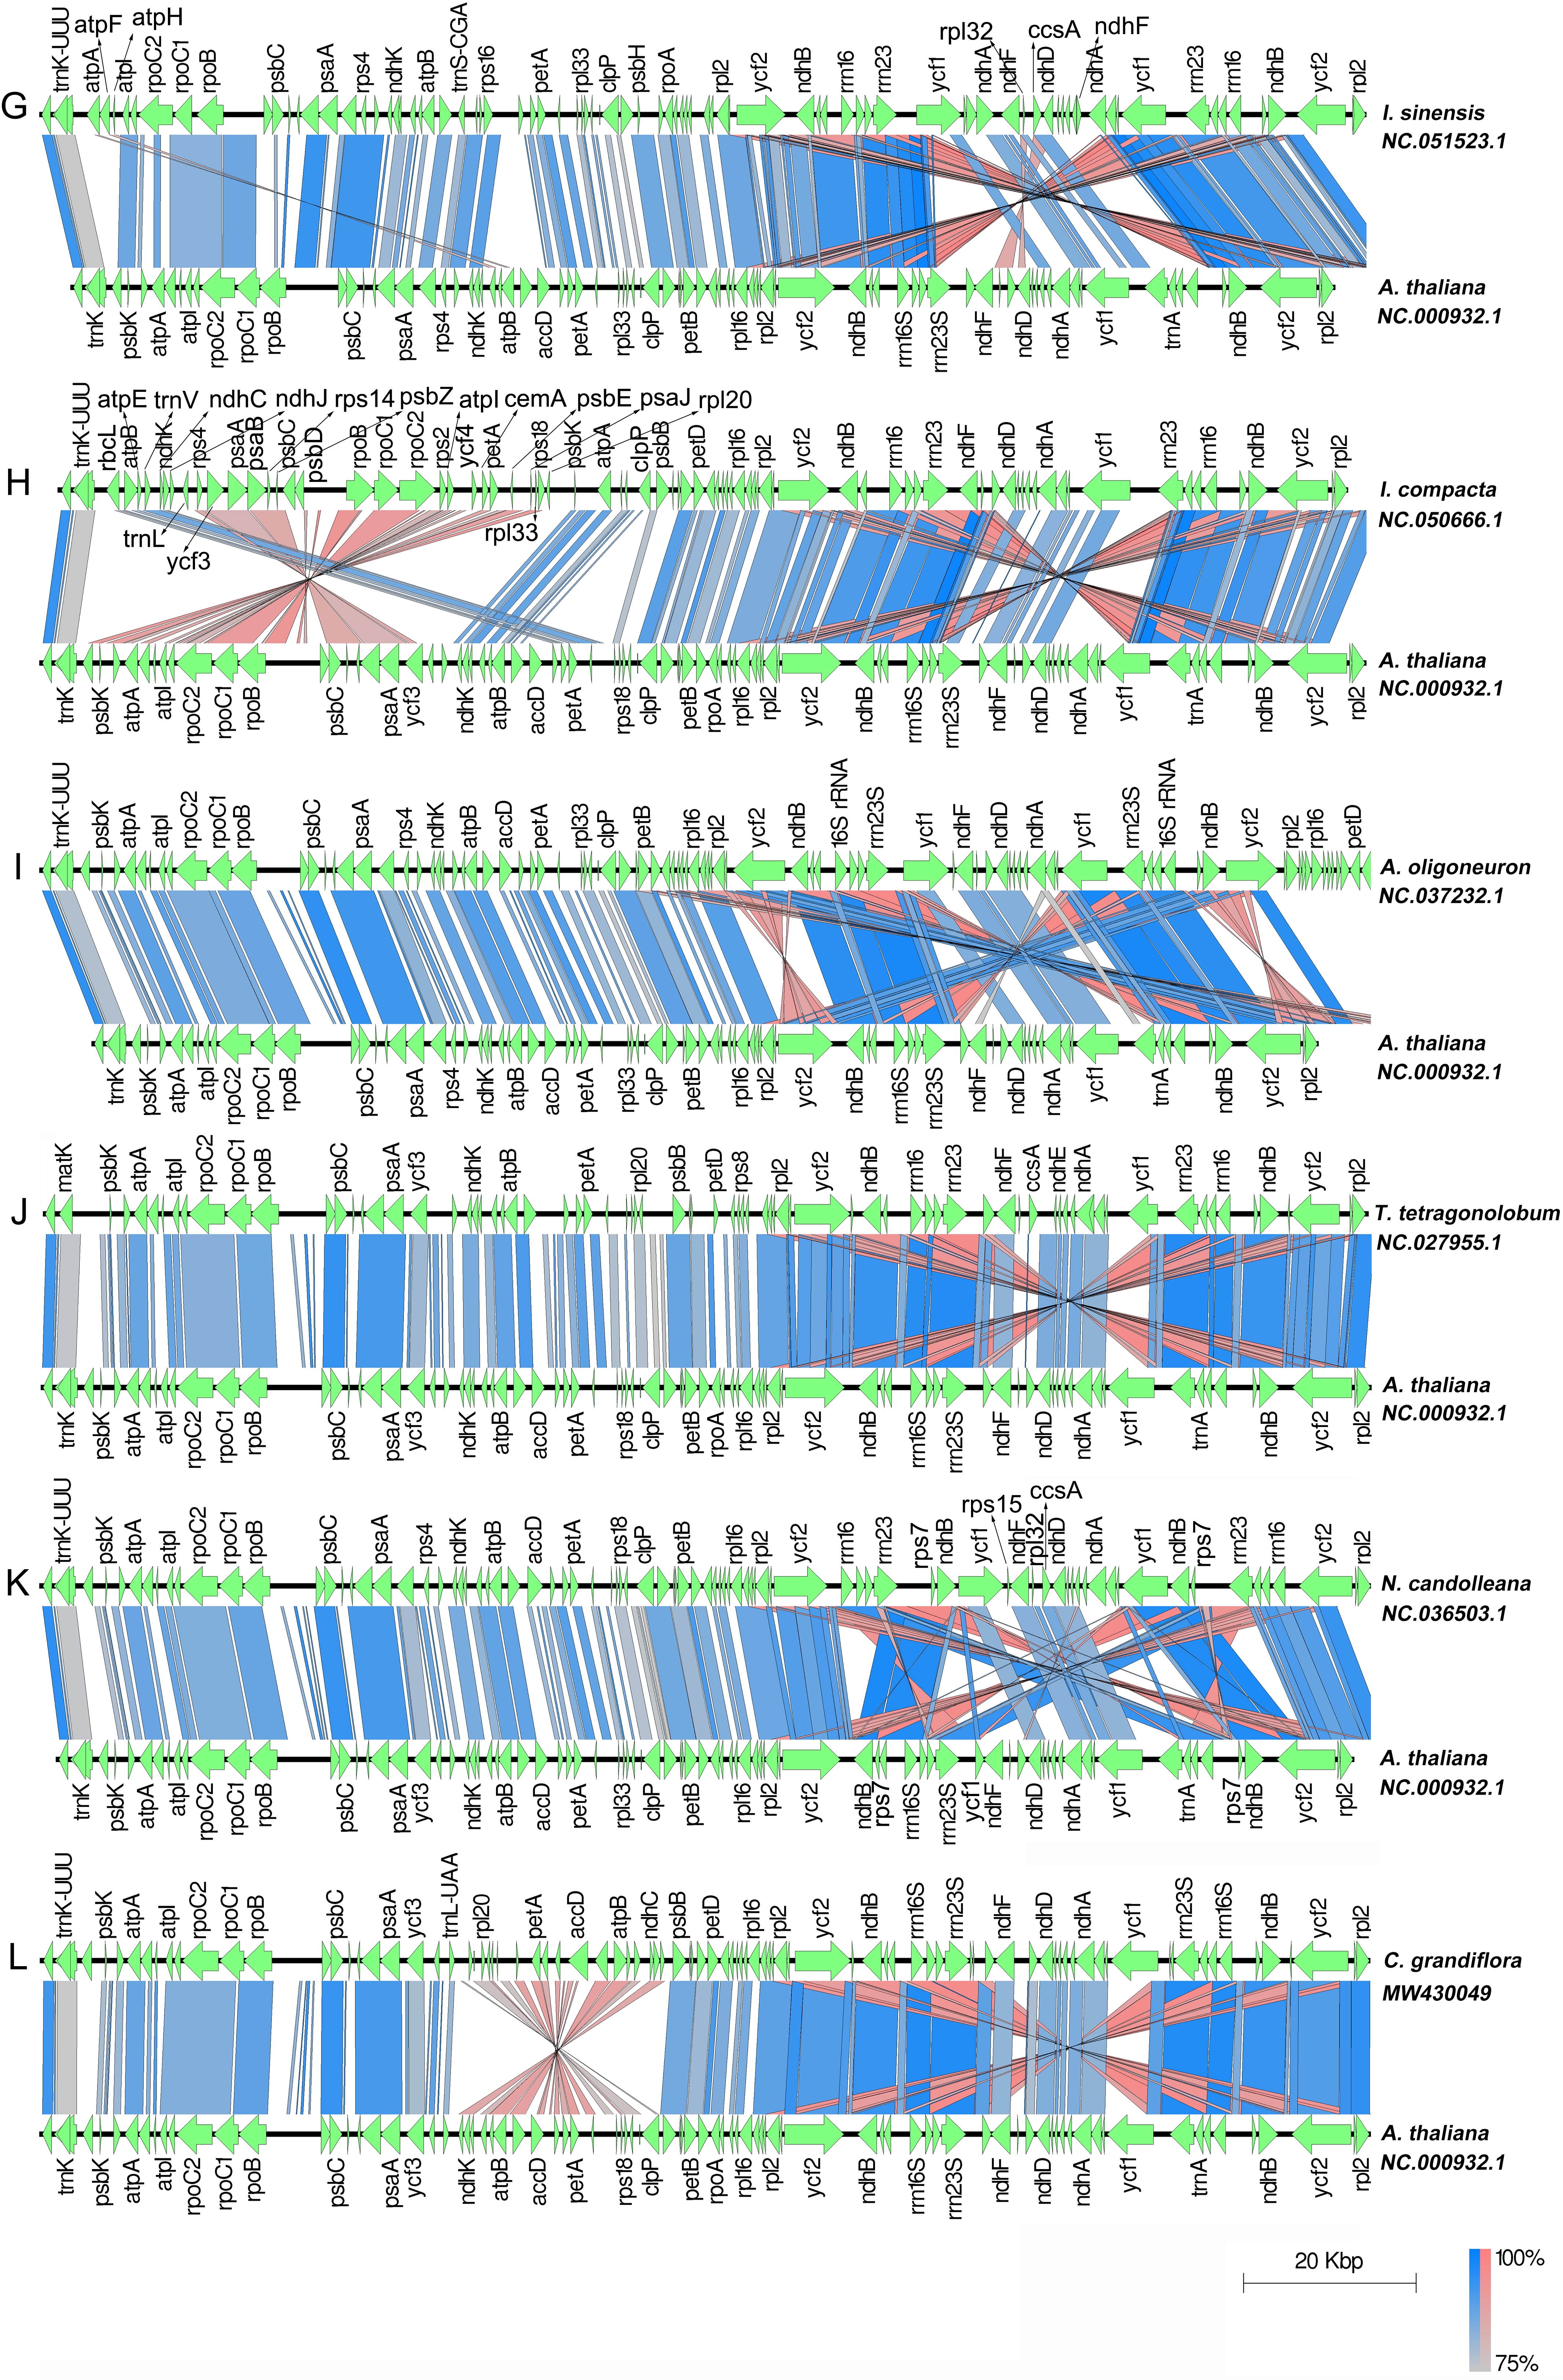


Figure S3. The pannel G to L shown that other 6 types of genome structure respectively from *I. sinensis, I. compacta, A. oligoneuron, T. tetragonolobum, N. candolleana, C. grandiflora*.
