# Supplementary material for: Complete chloroplast genome of Campsis grandiflora (Thunb.) Schum and systematical comparative analysis within the family Bignoniaceae.
Source: Research Square preprint supplement (doi:10.21203/rs.3.rs-992863/v1), 2021-10-20
Supplement: Supplementary file 4 [file e1eb86a455d54eb69a19dfa5.docx]

| **Species** | **Gene** | **Optimized branch length** | **LRTa** | ***p-value*b** |
| --- | --- | --- | --- | --- |
| *A. bracteatum* | *ndh*G | 0.0007 | 15.3402 | 0.0115 |
| *A. glaucum* | *rbc*L | 0.0006 | 26.8147 | 0.0000 |
| *A. divaricatum1* | *rbc*L | 0.0062 | 17.6518 | 0.0036 |
| *A. steyermarkii* | *rpl*22 | 0.0062 | 15.5590 | 0.0103 |
| *D. cynanchoides* | *rpl*22 | 0.0436 | 12.6716 | 0.0006 |
| *A. allamandiflorum* | *rpl*23 | 0.0046 | 41.8485 | 0.0000 |
| *A. chamberlaynii* | *rpl*23 | 0.0020 | 17.6637 | 0.0035 |
| *C. ovata* | *rps*12 | 0.0080 | 25.3449 | 0.0001 |
| *Campsis grandiflora* | *rps*12 | 0.0194 | 22.2939 | 0.0003 |
| *C. ovata* | *rps*15 | 0.0080 | 38.0108 | 0.0000 |

Table S5. Ka/Ks analysis of the family Bignoniaceae

aLikelihood ratio test statistic for selection.

bp-value corrected for multiple testing.
